# Supplementary material for: Effect of long chain fatty acids on the memory switching behavior of tetraindolyl derivatives
Source: Royal Society of Chemistry journal article supplement (doi:10.1039/d3ra03869f), 2023-01-01
Supplement: d3ra03869f1.pdf [file d3ra03869f1.pdf]

## **Supporting Information**

### Effect of long chain fatty acid on the memory switching behavior of tetraindolyl derivative

*Surajit Sarkar<sup>a</sup>, Hritinava Banik<sup>a</sup>, Farhana Yasmin Rahman<sup>a</sup>, Swapan Majumdar<sup>b</sup>, Debajyoti  
Bhattacharjee<sup>a</sup> and Syed Arshad Hussain<sup>\*a</sup>*

<sup>a</sup>Thin Film and Nanoscience Laboratory, Department of Physics, Tripura University,  
Suryamaninagar 799022, West Tripura, Tripura, India

<sup>b</sup>Department of Chemistry, Tripura University, Suryamaninagar 799022, West Tripura, Tripura,  
India

\* Corresponding author

Email: sa\_h153@hotmail.com, sahussain@tripurauniv.ac.in (SAH)

Ph: +919402122510 (M), Fax: +913812374802 (O)

No. of pages: 7  
No. of figures: 9

## List of contents:

**Figure S1:** Schematic representation of device structure.

**Figure S2:** I-V curves corresponding to the Indole2 mole fraction 0.4 and 0.2.

**Figure S3:** I-V characteristics of the Au/Indole2-SA/ITO device having compliance current (a) 0.5 mA and (b) 1  $\mu$ A with Indole2 molefraction 0.3.

**Figure S4:** I-V characteristics of the devices to get the idea of stability of the device during the period of 66 days (Device 1), 64 days (Device 2), 68 days (Device 3) and 240 days (Device 4).

**Figure. S5:**  $\Pi$ -A isotherm of Indole, SA and Indole-SA mixture in different molefraction 1 (pure Indole), 0.8, 0.7, 0.5, 0.4, 0.3, 0.2 and 0 (Pure SA).

**Figure S6:** Compression modulus vs surface pressure ( $C_s^{-1}$ - $\Pi$ ) graphs of pure Indole2, SA and their mixture at different Indole2 mole fraction.

**Figure. S7:** I-V characteristics of the device Au/Indole2-SA/ITO where active layer was deposited using LB technique (a) WORM characteristics with compliance current 1 mA and (b) RRAM characteristics with compliance current 1 mA in forward scan and no compliance current during reverse scan.

**Figure S8:** FESEM image of bare ITO.

**Figure. S9:** Variation of SET voltages ( $V_{Th}$ ) with the active layer thickness of the devices.

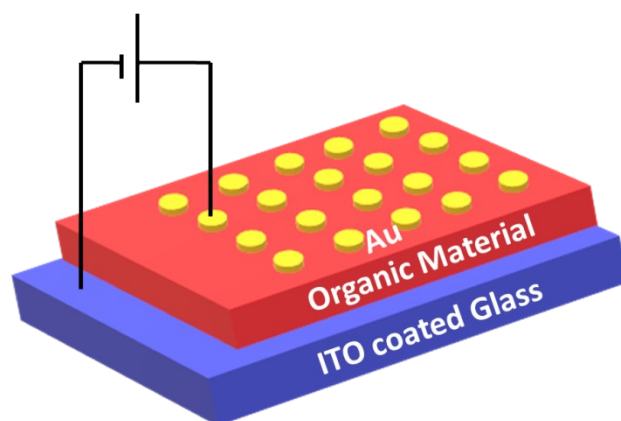

**Figure S1:** Schematic representation of device structure.

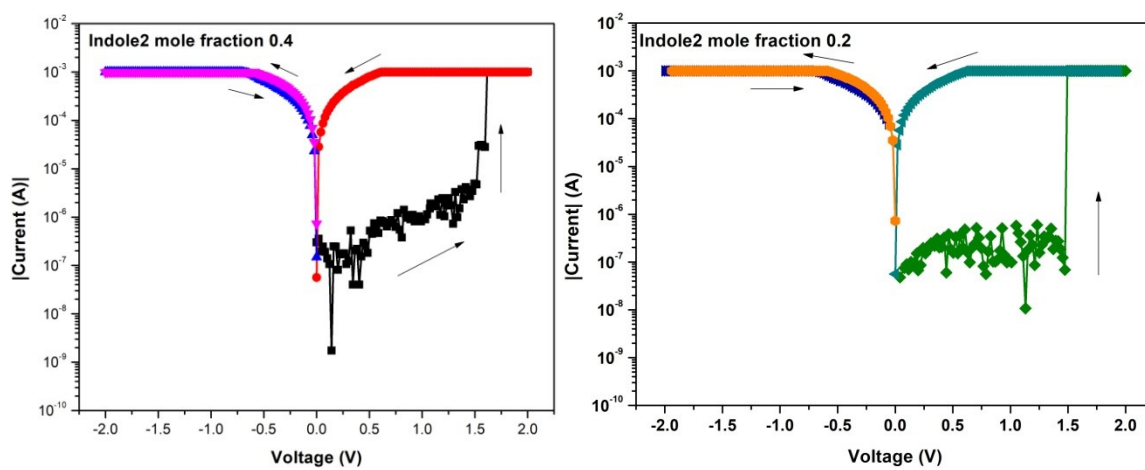

**Figure S2:** I-V curves corresponding to the Indole2 mole fraction 0.4 and 0.2.

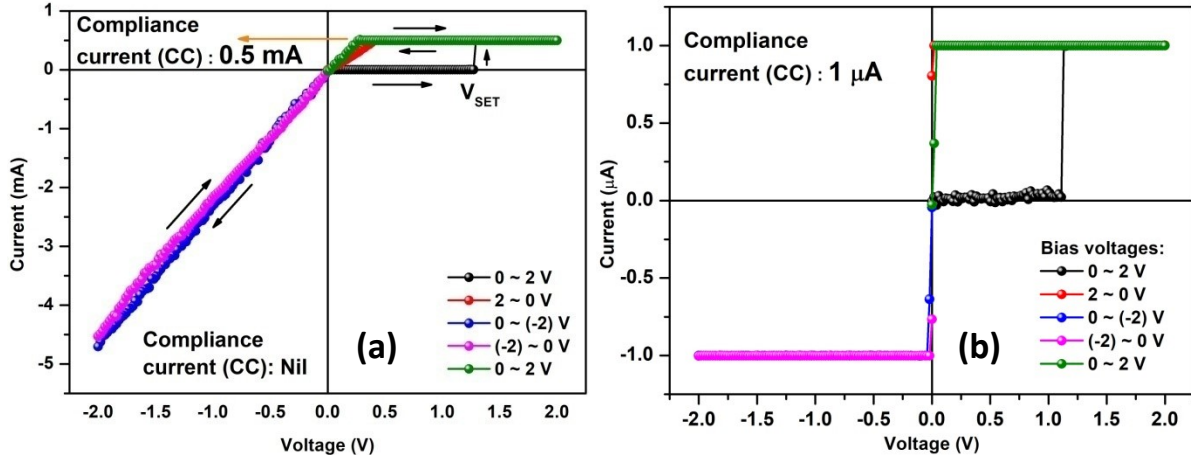

**Figure S3:** I-V characteristics of the Au/Indole2-SA/ITO device having compliance current (a) 0.5 mA and (b) 1  $\mu$ A with Indole2 molefraction 0.3.

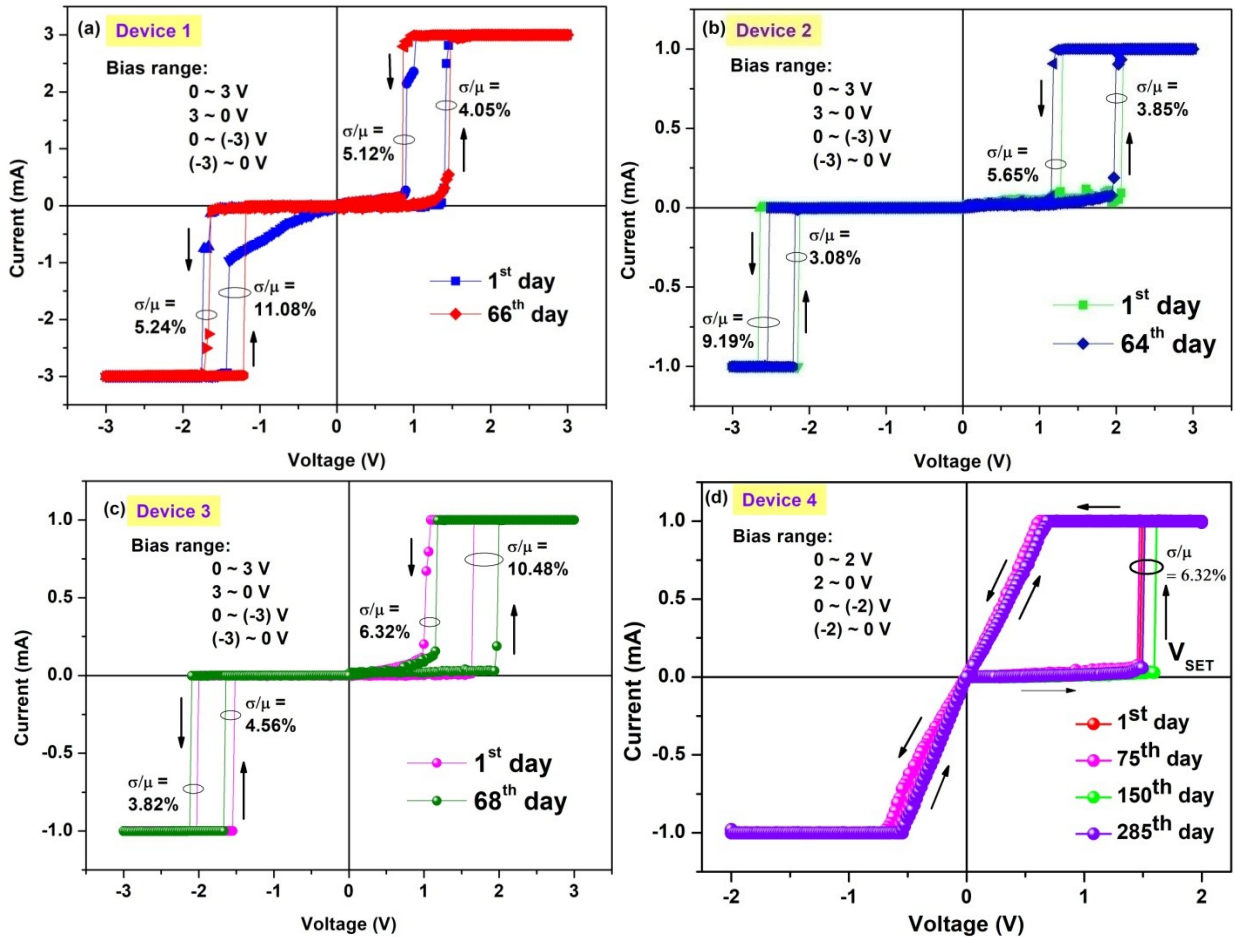

**Figure S4:** I-V characteristics of the devices to get the idea of stability of the device during the period of 66 days (Device 1), 64 days (Device 2), 68 days (Device 3) and 285 days (Device 4).

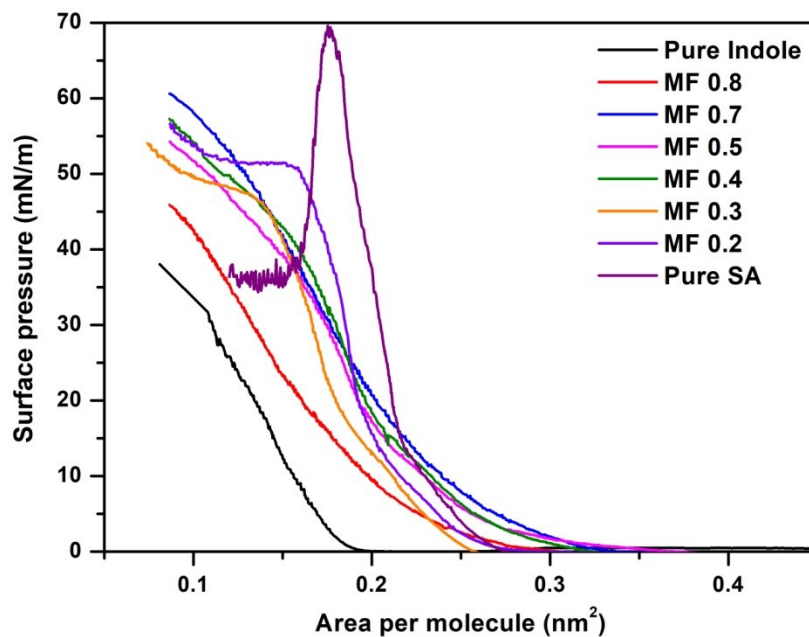

**Figure. S5:**  $\Pi$ -A isotherm of Indole, SA and Indole-SA mixture in different molefraction 1 (pure Indole), 0.8, 0.7, 0.5, 0.4, 0.3, 0.2 and 0 (Pure SA).

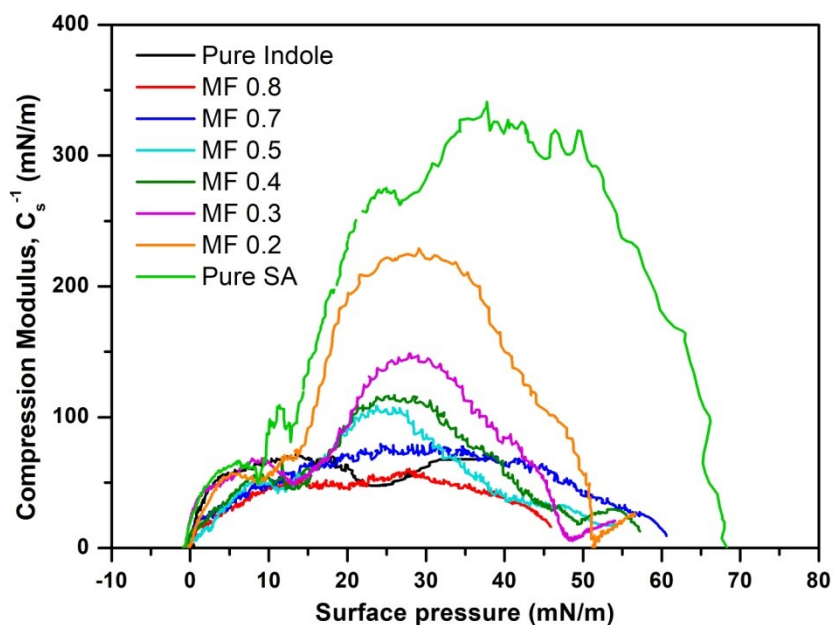

**Figure S6:** Compression modulus vs surface pressure ( $C_s^{-1}$ - $\Pi$ ) graphs of pure Indole2, SA and their mixture at different Indole2 mole fraction.

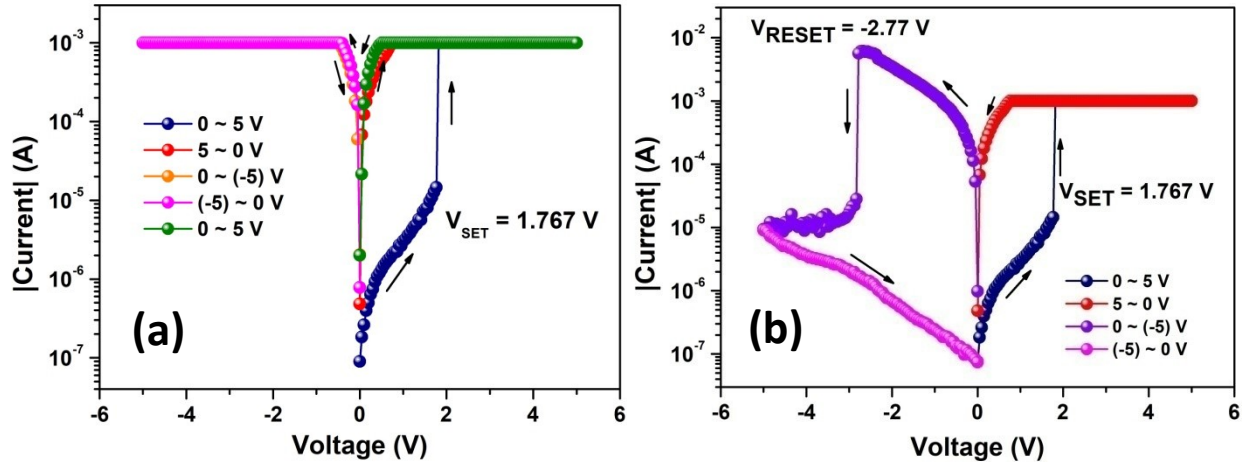

**Figure. S7:** I-V characteristics of the device Au/Indole2-SA/ITO where active layer was deposited using LB technique (a) WORM characteristics with compliance current 1 mA and (b) RRAM characteristics with compliance current 1 mA in forward scan and no compliance current during reverse scan.

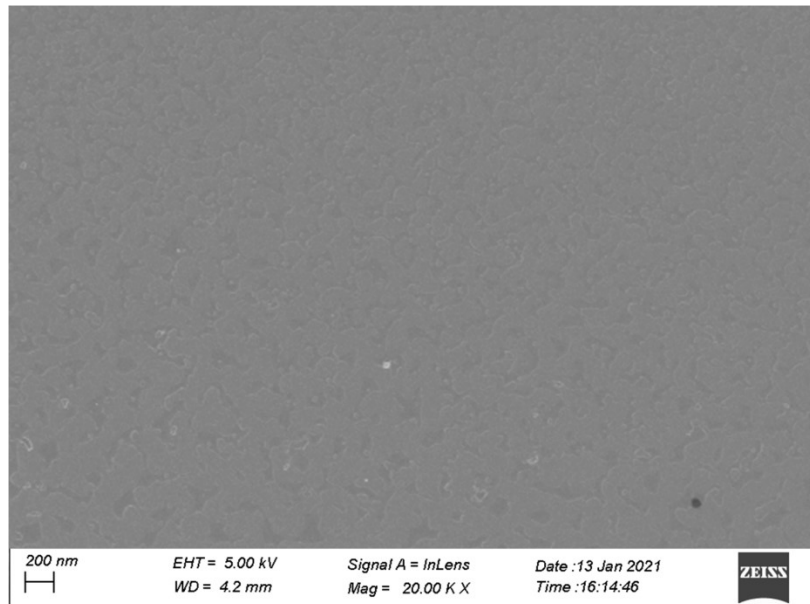

**Figure S8:** FESEM image of bare ITO.

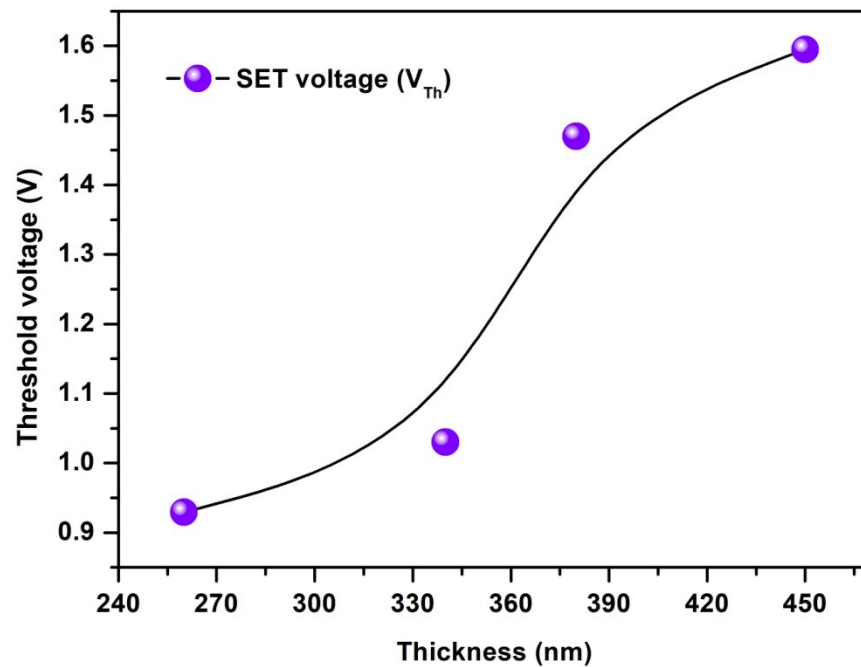

**Figure. S9:** Variation of SET voltages ( $V_{Th}$ ) with the active layer thickness of the devices.
